# Supplementary material for: Arabidopsis APx-R Is a Plastidial Ascorbate-Independent Peroxidase Regulated by Photomorphogenesis
Source: MDPI journal article supplement (doi:10.3390/antiox10010065), 2021-01-07
Supplement: s1 [file s1]

ATGGGT **CATCACCATCACCATCAC** GGCGGT **GAGAACC** TGTACTTCCAATCC AATGGC AGCAGCCGTGCAT  
 GGCGCATTTCGCTGCCTGAGCGATGATCCGGGTAGCAGCCATGTGTTGTGGCGAGCCGTTCGCAAAATGGT  
 GGTGCTGCTGAGCACCGTGCAGCTGCTGAGCCATATGCTGCCGACAGAACGGCAACCGGGCGGAAATTTAT  
 CCGGTGATGCAGAACGAAATTCGCAAAGTGGTGACCAAAGGCAAAGCGGCGGGCGTGTGCGCCTGGTGT  
 TTCATGATGCGGGCACCTTTGAACTGGATGATCATAGCGGTGGCATTAAACGGTAGCATTGCGTATGAACT  
 GGAACGTCCGGAAACATTGGCCTGAAGAAAAGCCTGAAAGTGTGGCGAAAGCGAAAGTGAAAGTGGAT  
 GAAATTCAGCCGGTGAGCTGGGCGGATATGATTAGCGTGGCAGGCAGCGAAGCGGTGAGCATTGCGGGTG  
 GTCCGACCATTCGGTGGTGTGGTCTGGATAGCGCGCAGCCGGATCCGGAAGGCAAACCTGCCGCC  
 GGAAACCCTGAGCGCGAGCGGCCTGAAAGAATGCTTTAAACGCAAAGGCTTTAGCACCCAGGAACTGGTG  
 GCGCTGAGCGGCGCGCATACCATTTGGCAGCAAAGGCTTTGGCGATCCGACCGTGTGTTGATAACGCGTATT  
 ATAAAATTCTGCTGGAAAACCGTGGACCAGCACCCAGCAAATGACCAGCATGGTGGGCGCTGCCGAGCGA  
 TCATGCGCTGGTGCAGGATGATGAATGCCTGCGCTGGGTGAAACGCTATGCGGAAGATCAGGATAAGTTC  
 TTTGAAGATTTACCAACGCGTATATCAAACCTGGTGAACAGCGGTGCGAAATGGAACATGCTGTGA

**Figure S1.** Coding sequence synthesized to express recombinant APx-R in *E. coli*. A fusion protein was produced using pET28b vector (Addgene). Bases highlighted in yellow encode a 6xHis-tag and in green, a cleavage site for TEV protease. In gray, codon optimized mature APx-R CDS (which excluded bases encoding the plastid transit peptide, determined by ChloroP Prediction Server - <http://www.cbs.dtu.dk/services/ChloroP/>).

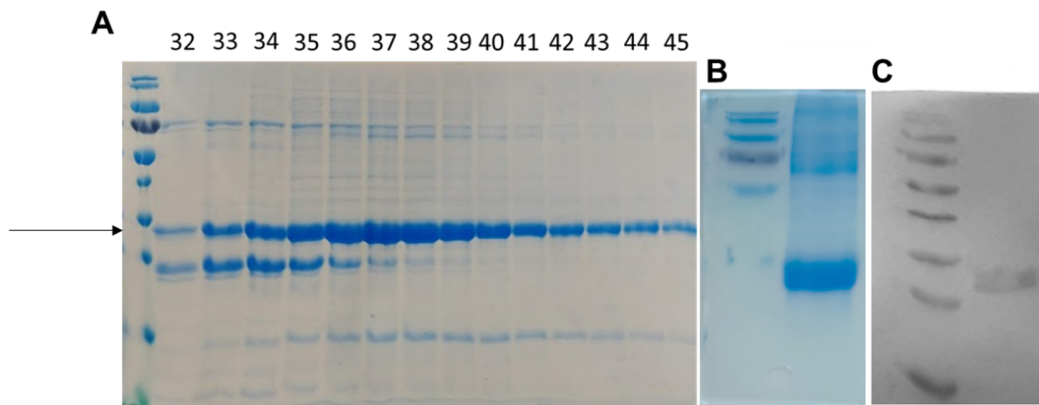

**Figure S2.** Overexpression and purification of recombinant APx-R in *E. coli*. A) SDS-PAGE analysis of elution fractions 32 to 45. The indicated protein (arrow) correlates in size with the calculated molecular mass of 33 kDa obtained from the deduced amino acid sequence of the cloned construct. Samples 38-50 were combined and analyzed by SDS-PAGE (B) and western blot (C), using anti-His antibody.

```

      *          20          *          40          *          60          *
APx-R : -MTTTTASLVKTFLEFRCDSSFSSFKFKCKFESPAKTRLLSPATEKH-----VVRSSRAWRIRCLSDDPGSSSHVFVAS : 70
APx01 : ----- : -
APx02 : ----- : -
APx03 : ----- : -
APx05 : ----- : -
SAPx  : MAERVSLTLNGTLLSPPTTTTTTMSSSLRSTTAASLLLRSSSSSSRSTLTLASSSSLSFVRSLSVSSPRLSSSSLS : 77
TAPx  : --MSVLSLSAASHLLC-----SSTRVLSLPAVTSSSSPVVALSSSTSPHSLGSLVASSSLFPHSSSVFL : 60

      80          *          100          *          120          *          140          *
APx-R : RRRMNVLLSTVQLLSHMLPQNGNAAEIYPVM--QNEIRKVVTKGKAAGVL-RLVFHDAGTFELDDHS----GGINGS : 140
APx01 : -----MTKNYPTVSEDKYKAVEKCRKRKRLGLIAEKNCAPIMVRLAWHSAGTFDCQSRT----GGPFGT : 59
APx02 : -----MVKKSYPVKEEYKAVQRCRKRKRLGLIAEKHCAPIVLRLAWHSAGTFDVKTKT----GGPFGT : 60
APx03 : -----MAAIVDAEYLKEITKARRELRLSIANKNCAPIMLRLAWHDAGTYDAQSKT----GGPNGS : 57
APx05 : -----MAVNVDAEYLKEIEKTRRDLRALISSRNCAPIMLRLAWHDAGTYDAKKT----GGANGS : 56
SAPx  : QKKYRIASVNRFSNSTAATKSSSDPDQLKNAREDIKELLSTKFCHPILVRLGWHDAGTYNKNIEWPQRGGANGS : 154
TAPx  : QKKHPINGT----STRMISPKCAASDAAQLISAKEDIKVLLRWHTKFCHPILVRLGWHDAGTYNKNIEWPLRGGANGS : 133
      l c pi RL wH AGT GG G

      160          *          180          *          200          *          220          *
APx-R : IAY--ELERPENIGLKKSLKVLAKAKVKVDEIQPVSWADMISVAGSEAVSICGGPTIPVVLGRLDSA---QDPPEGK : 212
APx01 : MRFDAEQAHGANSGIHIALRLLDPIR---EQFPTISFADFHQLAGVVAVEVTGGPDIPFHPGREDKP---QPPPEGR : 130
APx02 : IRHPQELAHDANGLDIAVRLLDPIK---ELFPILSYADFYQLAGVVAVEITGGPEIPFHPGRLDKV---EPPPEGR : 131
APx03 : IRNEEETHGANSGLKIALDLCEGVK---AKHPKITYADLYQLAGVVAVEVTGGPDIVFPGRKDSN---VCPKEGR : 128
APx05 : IRFKEELNRPHNKLEKAVAFCEEVK---AKHPRVSYADLYQLAGVVAVEVTGGPAIPFTPGRKDA---DSADDGE : 126
SAPx  : LRFDIELKHAANAGLNVNALNLIKDIK---EKYSGISYADLFQLASATAIEEAGGPKIPMKYGRVDSAGPEDCPEEGR : 228
TAPx  : LRFEAELKHAANAGLNLKLIQPLK---DKYPNISYADLFQLASATAIEEAGGPIPMKYGRVVAPEQCPEEGR : 207
      r E N Gl a k s AD qlA A e GGP Ip GR D eG

      240          *          260          *          280          *          300
APx-R : LPP--ETLSASGLKECFKR-KGFSTQELVALSGAHTIG----SKGF-----GDPTVFDNA : 260
APx01 : LPD--ATKGCDHLRDVFAKQMGLSDKDIVALSGAHTLGRCHKDRSGF-----EGA-----WTSNPLIFDNS : 189
APx02 : LPQ--ATKGVDHLRDVFGR-MGLNDKDIVALSGGHTLGRCHKESGF-----EGA-----WTPNPLIFDNS : 189
APx03 : LPD--AKQGFQHLRDVFYR-MGLSDKDIVALSGGHTLGRAHPESGF-----DGP-----WTQEPLKFDNS : 186
APx05 : LPN--PNEGASHLRTLFSR-MGLLDRDIVALSGGHTLGRAHKESDF-----EGP-----WTQDPLKFDNS : 184
SAPx  : LPDAGPPSPATHLREVFYR-MGLDDKDIVALSGAHTLGRSRPESGWGKPETKYTKKEGPGAGQSWTPEWLKFDNS : 304
TAPx  : LPDAGPPSPADHLRDVFYR-MGLDDKEIVALSGAHTLGRARPDSGWGKPETKYTKTGPGEAGQSWTVKWLKFDNS : 283
      LP hLr F r mGl d iVALSG HTlGr rsg g wt l FDNS

      *          320          *          340          *          360          *          380
APx-R : YYKILLEKPWTSTSKMTSMVGLPSDHALVQDDECLRWKRYAEDQDKFFEDFTNAYIKLNVNSGAKWNML----- : 329
APx01 : YFKELLSG-----EKEGLLQLVSDKALDDPVFRPLVEKYAADEDAFFADYAEAHMKLSELG--FADA----- : 250
APx02 : YFKEILSG-----EKEGLLQLPTDKALDDPLFPFVEKYAADEDAFFEDYTEAHLKLSELG--FADKE----- : 251
APx03 : YFVELLKG-----ESEGLLKLPTDKTLLEDPEFRRLVELYAKDEDAFFRDYAESHKKLSELG--FNPNSSAGK--- : 252
APx05 : YFVELLKG-----ETPGLLQLKTDKALDDPKFHPFVKLYAKDEMFFKAYAISHKKLSELG--FNPPRRIPS--- : 250
SAPx  : YFKEIKEK-----RDELLVLPTDAAIFEDSSFKVYAEKYAADQDAFFKDYAVAHAKLSNLGAEFPNPEGIVI--- : 372
TAPx  : YFKDIKEK-----RDDDLLVLPTDAALFEDPSFKNYAEKYAEDVAAFFKDYAEAHAKLSNLGAKFDPPEGIVIENV : 354
      Yf ll L D al D f YA D d FF dy h KLs lG f

      *          400          *          420          *          440          *
APx-R : ----- : -
APx01 : ----- : -
APx02 : ----- : -
APx03 : -----AVADSTILAQSAFGVAVAAAVVAFGYFYEIRKRMK----- : 287
APx05 : -----AVTQQTL-----GIAVAAAVVIFTICYEASRRGK----- : 279
SAPx  : ----- : -
TAPx  : PEKFVAAKYSTGKKELSDSMKKKIRAEYEAIGGSPDKPLPTNYFLNIIAIGVLVLLSTLFGGNNNSDFSGF : 426

```

**Figure S3.** Protein alignment of Arabidopsis APx-R and APx proteins. Catalytic residues are marked in blue and ascorbate-binding arginine, in green. APx-R chloroplast transit peptide is indicated in orange, according to ChloroP Prediction Server (<http://www.cbs.dtu.dk/services/ChloroP/>) (APx-R, At4g32320; APx1, At1g07890; APx2, At3g09640; APx3, At4g35000; APx5, At4g35970; TAPx, At1g77490; SAPx, At4g08390).

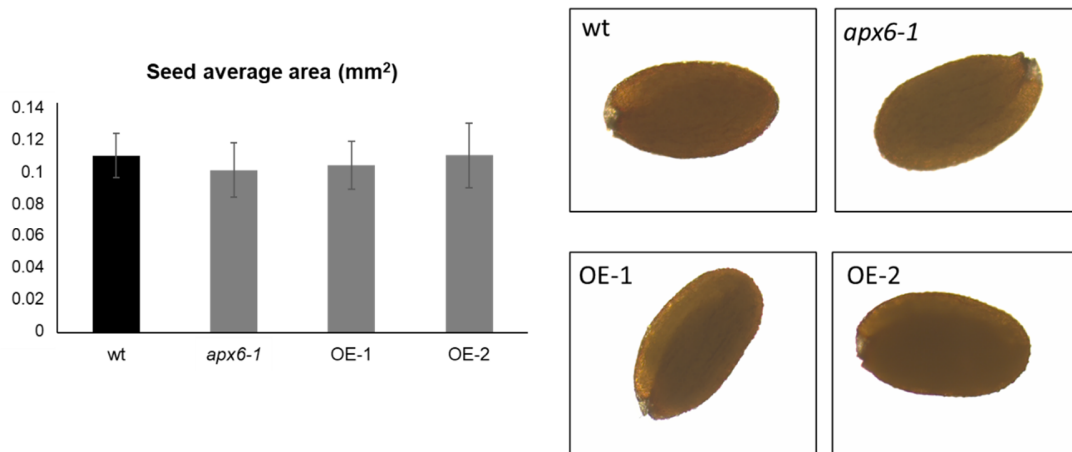

**Figure S4.** Morphologic analysis of *apx-r* and AtAPx-R-YFP OE seeds. Thirty seeds from each genotype (Col-0 WT, *apx6-1*, AtAPx-R-YFP OE-1, and OE-2) were photographed and measured on ImageJ software. No significant differences were observed for seed average area and overall morphology.

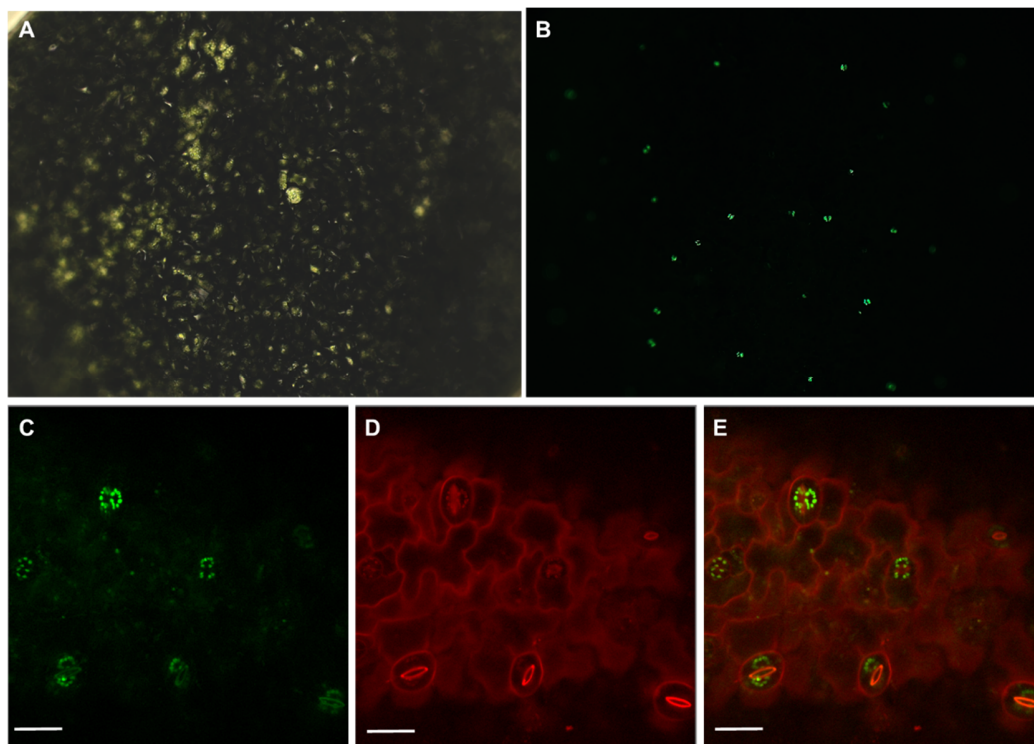

**Figure S5.** APx-R-YFP signal is retained in guard cells chloroplasts. A, B) Fluorescence microscopy image of expanded cotyledon from AtAPx-R-YFP OE-2 seedling showing APx-R-YFP persistence in stomata, while depleted from surrounding cells. C-E) Confocal image of AtAPx-R-YFP OE-1 expanded cotyledon. In green, YFP fluorescence (B, C, and E). In red, propidium iodide fluorescence (D and E). Scale: 25  $\mu$ m.

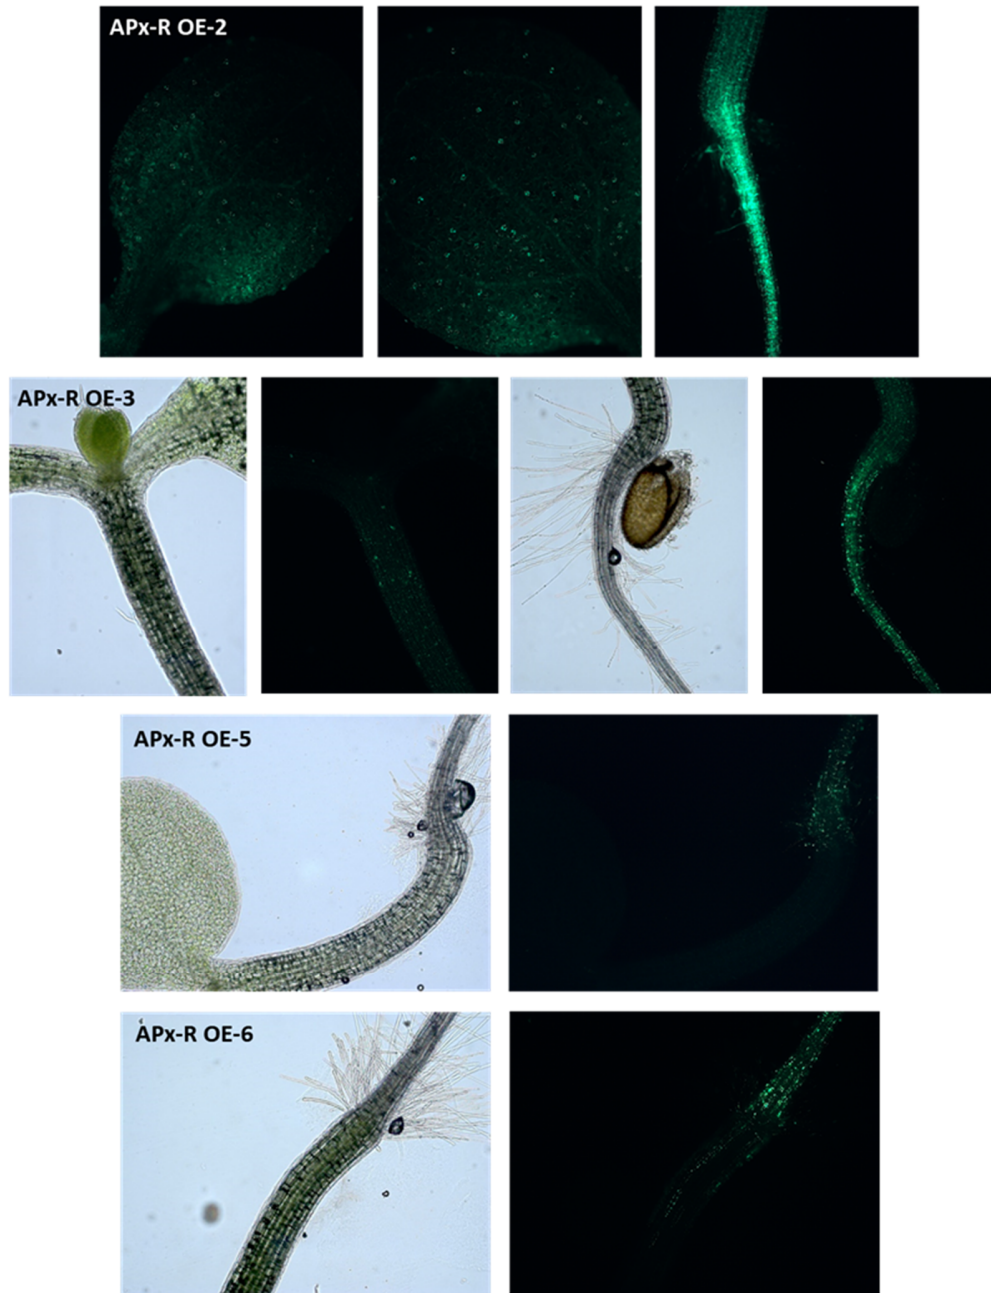

**Figure S6.** Recombinant *AtAPx-R-YFP* is detectable in roots but does not accumulate in green tissues. Fluorescence microscopy images obtained from cotyledons and roots of four-day-old *AtAPx-R-YFP* OE T2 seedlings from four independent lines (OE-2, OE-3, OE-5, and OE-6). YFP fluorescence is showed in green.



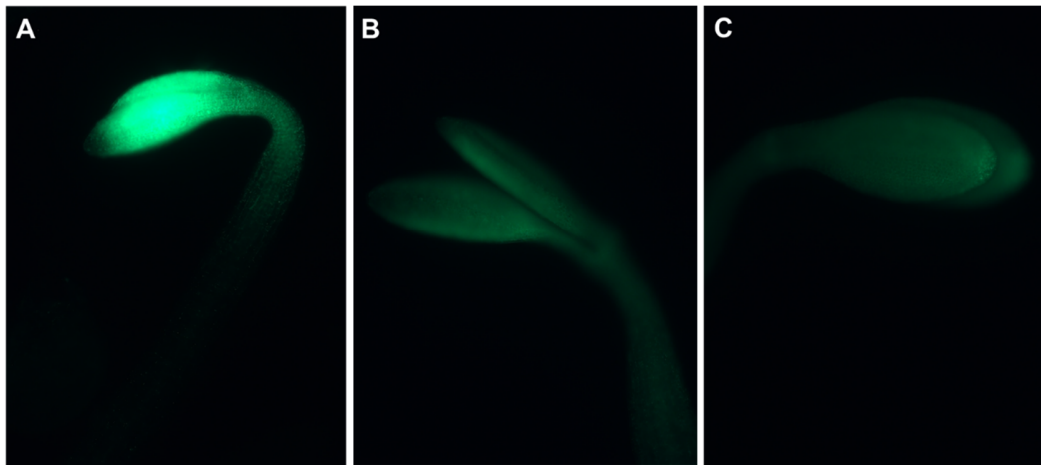

**Figure S7.** APx-R degradation is a proteasome-independent process. Four-day-old AtAPx-R-YFP OE-2 seedlings germinated in the dark and exposed to (A) 0 h of light, (B) 5 h of light, or (C) 5 h of light in the presence of 50  $\mu$ M MG-132.

**Table S1.** Identification of Arabidopsis APx-R in proteomic data deposited on The Plant Proteome Database (<http://ppdb.tc.cornell.edu/>).

| Experiment code | Description                                                                                                                                                                                                                                                                                                                                                                                                                                                                                                                                                                                                                                                                                                                                           | Tissue             | Sample        | Genotype  |
|-----------------|-------------------------------------------------------------------------------------------------------------------------------------------------------------------------------------------------------------------------------------------------------------------------------------------------------------------------------------------------------------------------------------------------------------------------------------------------------------------------------------------------------------------------------------------------------------------------------------------------------------------------------------------------------------------------------------------------------------------------------------------------------|--------------------|---------------|-----------|
| 1518            | MS/MS analysis of plastoglobuli (PG) isolated from 6 weeks (in vegetative phase) or 12 weeks (flowering, advanced senescence stage) old rosettes of soil grown plants under short day light period (8h light / 16 h dark). This sample is from 6-week-old wt, purified PG replicate 2 (gel bands 31-36) Published in Bhuiyan et al. (2016) The Plant Cell 28(12):3020-3037                                                                                                                                                                                                                                                                                                                                                                            | leaf (A. thaliana) | plastoglobuli | wild-type |
| 1520            | MS/MS analysis of plastoglobuli (PG) isolated from 6 weeks (in vegetative phase) or 12 weeks (flowering, advanced senescence stage) old rosettes of soil grown plants under short day light period (8h light / 16 h dark). This sample is from 6-week-old m48-1, purified PG replicate 2 (gel bands 43-48) Published in Bhuiyan et al. (2016) The Plant Cell 28(12):3020-3037                                                                                                                                                                                                                                                                                                                                                                         | leaf (A. thaliana) | plastoglobuli | m48-1     |
| 1870            | TAILS Arabidopsis thaliana (Col-0) baseline N-terminome, chloroplast stroma, dimethyl label (L), in solution digest and TAILS enrichment for N-termini (BioRep1), 3 samples, 4 LC/MS run following initial label, 7 LC/MS runs following TAILS. LTQ Orbitrap, 140 minutes gradient, 5 to 40% D solvent over 96 min, FTMS scans in Profile mode, normalized CE set to 30 (up from 25), min counts for MS/MS set to 1000, 2 MS/MS microscans summed. Data were searched against TAIR10 using MASCOT v2.4.0, semi-ArgC enzyme search specificity, 4 ppm and 0.8 Da MS and MS/MS mass tolerance respectively. Fixed modifications: dimethyl Lys, carboxamidomethyl Cys. Variable mods: dimethyl N-termini, acetyl N-termini, pyroGlu – Gln, oxidized Met. | leaf (A. thaliana) | stroma        | wild-type |
| 1875            | TAILS Arabidopsis thaliana (Col-0) baseline N-terminome, total soluble leaf after dimethyl label (L), in solution/in gel digest with tryp, GluC or                                                                                                                                                                                                                                                                                                                                                                                                                                                                                                                                                                                                    | leaf (A. thaliana) | total soluble | wild-type |

both and TAILS enrichment for N-termini determination (BioRep2), 6 samples, 7 LC/MS run following initial label, 20 LC/MS runs following TAILS, LTQ Orbitrap, 120 minutes gradient, 5 to 40% D solvent over 96 min, FTMS scans in Profile mode, normalized CE set 25, min counts for MS/MS set to 1000, 2 MS/MS microscans summed. Data were searched against TAIR10 using MASCOT v2.4.0, semi-ArgC enzyme search specificity, 4 ppm and 0.8 Da MS and MS/MS mass tolerance respectively. Fixed modifications: dimethyl Lys, carboxamidomethyl Cys. Variable mods: dimethyl N-termini, acetyl N-termini, pyroGlu – Gln, oxidized Met.

|      |                                                                                                                                                                                                                                                                                                                                                                                                                                              |                    |                   |                         |
|------|----------------------------------------------------------------------------------------------------------------------------------------------------------------------------------------------------------------------------------------------------------------------------------------------------------------------------------------------------------------------------------------------------------------------------------------------|--------------------|-------------------|-------------------------|
| 1943 | Arabidopsis stroma from Kenji for spectral counting, 1D SDS PAGE, blue coomassie stained, WT or CLPF mutant or ClpS1 mutant. This contributed to the publication Nishimura et al 2015 Plant Cell                                                                                                                                                                                                                                             | leaf (A. thaliana) | stroma            | wild-type               |
| 1945 | Arabidopsis stroma from Kenji for spectral counting, 1D SDS PAGE, blue coomassie stained, WT or CLPF mutant or ClpS1 mutant. This contributed to the publication Nishimura et al 2015 Plant Cell                                                                                                                                                                                                                                             | leaf (A. thaliana) | stroma            | UVR                     |
| 1946 | Arabidopsis stroma from Kenji for spectral counting, 1D SDS PAGE, blue coomassie stained, WT or CLPF mutant or ClpS1 mutant. This contributed to the publication Nishimura et al 2015 Plant Cell                                                                                                                                                                                                                                             | leaf (A. thaliana) | stroma            | wild-type               |
| 1947 | Arabidopsis stroma from Kenji for spectral counting, 1D SDS PAGE, blue coomassie stained, WT or CLPF mutant or ClpS1 mutant. This contributed to the publication Nishimura et al 2015 Plant Cell                                                                                                                                                                                                                                             | leaf (A. thaliana) | stroma            | clpS                    |
| 2006 | MS/MS analysis of plastoglobuli (PG) isolated from wt Arabidopsis col-0, overexpressor M48 (OE) or RNAi M48 (RNAi) underexpression lines isolated from senescencing rosettes of plants grown on soil for 35 days (flowering, advanced senescence stage) under long day light period (18h light / 6h dark). This sample is OE, purified PG replicate 2 (gel bands 13-24) Published in Bhuiyan et al. (2016) The Plant Cell 28(12):3020-3037   | leaf (A. thaliana) | plastoglobuli     | M48 overexpression      |
| 2008 | MS/MS analysis of plastoglobuli (PG) isolated from wt Arabidopsis col-0, overexpressor M48 (OE) or RNAi M48 (RNAi) underexpression lines isolated from senescencing rosettes of plants grown on soil for 35 days (flowering, advanced senescence stage) under long day light period (18h light / 6h dark). This sample is RNAi, purified PG replicate 2 (gel bands 61-72) Published in Bhuiyan et al. (2016) The Plant Cell 28(12):3020-3037 | leaf (A. thaliana) | plastoglobuli     | M48 RNAi                |
| 2009 | Analyses of prep1-1 x prep2-1, opda1-2 and Prep1-1 x prep2-1 x opda1-2 mutants for spectral counting by Jitae. Proteins (50µg per lane) are separated with a 1D SDS-PAGE, coomassie stained, extracted and digested with trypsin. Peptides from the digestion are analyzed by nano LC-MSMS on a Orbitrap-LTQ mass spectrometer                                                                                                               | leaf (A. thaliana) | total leaf tissue | wild-type               |
| 2010 | Analyses of prep1-1 x prep2-1, opda1-2 and Prep1-1 x prep2-1 x opda1-2 mutants for spectral counting by Jitae. Proteins (50µg per lane) are separated with a 1D SDS-PAGE, coomassie stained, extracted and digested with trypsin. Peptides from the digestion are analyzed by nano LC-MSMS on a Orbitrap-LTQ mass spectrometer                                                                                                               | leaf (A. thaliana) | total leaf tissue | prep1-1xprep2-1         |
| 2012 | Analyses of prep1-1 x prep2-1, opda1-2 and Prep1-1 x prep2-1 x opda1-2 mutants for spectral counting by Jitae. Proteins (50µg per lane) are                                                                                                                                                                                                                                                                                                  | leaf (A. thaliana) | total leaf tissue | prep1-1xprep2-1xopda1-2 |

|      |                                                                                                                                                                                                                                                                                                                                                                                                                                                                                                                                                                                                                                                                                                                                                                                                                                                                                                                                                                     |                    |                   |                         |
|------|---------------------------------------------------------------------------------------------------------------------------------------------------------------------------------------------------------------------------------------------------------------------------------------------------------------------------------------------------------------------------------------------------------------------------------------------------------------------------------------------------------------------------------------------------------------------------------------------------------------------------------------------------------------------------------------------------------------------------------------------------------------------------------------------------------------------------------------------------------------------------------------------------------------------------------------------------------------------|--------------------|-------------------|-------------------------|
|      | separated with a 1D SDS-PAGE, coomassie stained, extracted and digested with trypsin. Peptides from the digestion are analyzed by nano LC-MSMS on a Orbitrap-LTQ mass spectrometer                                                                                                                                                                                                                                                                                                                                                                                                                                                                                                                                                                                                                                                                                                                                                                                  |                    |                   |                         |
| 2014 | Analyses of prep1-1 x prep2-1, opda1-2 and Prep1-1 x prep2-1 x opda1-2 mutants for spectral counting by Jitae. Proteins (50µg per lane) are separated with a 1D SDS-PAGE, coomassie stained, extracted and digested with trypsin. Peptides from the digestion are analyzed by nano LC-MSMS on a Orbitrap-LTQ mass spectrometer                                                                                                                                                                                                                                                                                                                                                                                                                                                                                                                                                                                                                                      | leaf (A. thaliana) | total leaf tissue | prep1-1xprep2-1         |
| 2015 | Analyses of prep1-1 x prep2-1, opda1-2 and Prep1-1 x prep2-1 x opda1-2 mutants for spectral counting by Jitae. Proteins (50µg per lane) are separated with a 1D SDS-PAGE, coomassie stained, extracted and digested with trypsin. Peptides from the digestion are analyzed by nano LC-MSMS on a Orbitrap-LTQ mass spectrometer                                                                                                                                                                                                                                                                                                                                                                                                                                                                                                                                                                                                                                      | leaf (A. thaliana) | total leaf tissue | opda1-2                 |
| 2020 | Analyses of prep1-1 x prep2-1, opda1-2 and Prep1-1 x prep2-1 x opda1-2 mutants replica 3 for spectral counting by Jitae. Proteins (50µg per lane) are separated with a 1D SDS-PAGE, coomassie stained, extracted and digested with trypsin. Peptides from the digestion are analyzed by nano LC-MSMS on a Orbitrap-LTQ mass spectrometer                                                                                                                                                                                                                                                                                                                                                                                                                                                                                                                                                                                                                            | leaf (A. thaliana) | total leaf tissue | prep1-1xprep2-1xopda1-2 |
| 2031 | TAILS experiment of chloroplast stroma to preform relative quantification (precursor-ion based) of protein N-termini between Col-0 control and icp55c-3 mutant, replicate 1A. WT - dimethyl +28, MU - heavy dimethyl +32, Light database search only. 100 micrograms protein of each genotype mixed after dimethyl labeling, proteins digested with trypsin and internal peptides crosslinked to HPG polymer then removed by ultrafiltration (30 kDa cutoff). LTQ Orbitrap, 140 minutes gradient, 5 to 40% D solvent over 96 min, FTMS scans in Profile mode, normalized CE set to 35 (up from 25), min counts for MS/MS set to 1000, 2 MS/MS microscans summed. Data were searched against TAIR10 using MASCOT v2.4.0, semi-ArgC enzyme search specificity, 4 ppm and 0.8 Da MS and MS/MS mass tolerance respectively. Fixed modifications: dimethyl Lys, carboxamidomethyl Cys. Variable mods: dimethyl N-termini, acetyl N-termini, pyroGlu – Gln, oxidized Met. | leaf (A. thaliana) | stroma            | wild-type and icp55c-3  |
| 2032 | TAILS experiment of chloroplast stroma to preform relative quantification (precursor-ion based) of protein N-termini between Col-0 control and icp55c-3 mutant, replicate 1A. WT - dimethyl +28, MU - heavy dimethyl +32, Heavy database search only. 100 micrograms protein of each genotype mixed after dimethyl labeling, proteins digested with trypsin and internal peptides crosslinked to HPG polymer then removed by ultrafiltration (30 kDa cutoff). LTQ Orbitrap, 140 minutes gradient, 5 to 40% D solvent over 96 min, FTMS scans in Profile mode, normalized CE set to 35 (up from 25), min counts for MS/MS set to 1000, 2 MS/MS microscans summed. Data were searched against TAIR10 using MASCOT v2.4.0, semi-ArgC enzyme search specificity, 4 ppm and 0.8 Da MS and MS/MS mass tolerance respectively. Fixed modifications: dimethyl Lys, carboxamidomethyl Cys. Variable mods: dimethyl N-termini, acetyl N-termini, pyroGlu – Gln, oxidized Met. | leaf (A. thaliana) | stroma            | wild-type and icp55c-3  |
| 2033 | TAILS experiment of chloroplast stroma to preform relative quantification (precursor-ion based) of protein N-termini between Col-0 control and icp55c-3 mutant, replicate 1B. MU - dimethyl +28, WT - heavy dimethyl +32, Light database search only. 100 micrograms protein                                                                                                                                                                                                                                                                                                                                                                                                                                                                                                                                                                                                                                                                                        | leaf (A. thaliana) | stroma            | wild-type and icp55c-3  |

|      |                                                                                                                                                                                                                                                                                                                                                                                                                                                                                                                                                                                                                                                                                                                                                                                                                                                                                                                                                                                                                                                                                                                                                                                                                                                                                                                                                                                                                                                                                                                                                                                                                                                                          |                    |        |                        |
|------|--------------------------------------------------------------------------------------------------------------------------------------------------------------------------------------------------------------------------------------------------------------------------------------------------------------------------------------------------------------------------------------------------------------------------------------------------------------------------------------------------------------------------------------------------------------------------------------------------------------------------------------------------------------------------------------------------------------------------------------------------------------------------------------------------------------------------------------------------------------------------------------------------------------------------------------------------------------------------------------------------------------------------------------------------------------------------------------------------------------------------------------------------------------------------------------------------------------------------------------------------------------------------------------------------------------------------------------------------------------------------------------------------------------------------------------------------------------------------------------------------------------------------------------------------------------------------------------------------------------------------------------------------------------------------|--------------------|--------|------------------------|
| 2034 | <p>of each genotype mixed after dimethyl labeling, proteins digested with trypsin and internal peptides crosslinked to HPG polymer then removed by ultrafiltration (30 kDa cutoff). LTQ Orbitrap, 140 minutes gradient, 5 to 40% D solvent over 96 min, FTMS scans in Profile mode, normalized CE set to 35 (up from 25), min counts for MS/MS set to 1000, 2 MS/MS microscans summed. Data were searched against TAIR10 using MASCOT v2.4.0, semi-ArgC enzyme search specificity, 4 ppm and 0.8 Da MS and MS/MS mass tolerance respectively. Fixed modifications: dimethyl Lys, carboxamidomethyl Cys. Variable mods: dimethyl N-termini, acetyl N-termini, pyroGlu – Gln, oxidized Met.</p> <p>TAILS experiment of chloroplast stroma to preform relative quantification (precursor-ion based) of protein N-termini between Col-0 control and icp55c-3 mutant, replicate 1B. MU - dimethyl +28, WT - heavy dimethyl +32, Heavy database search only. 100 micrograms protein of each genotype mixed after dimethyl labeling, proteins digested with trypsin and internal peptides crosslinked to HPG polymer then removed by ultrafiltration (30 kDa cutoff). LTQ Orbitrap, 140 minutes gradient, 5 to 40% D solvent over 96 min, FTMS scans in Profile mode, normalized CE set to 35 (up from 25), min counts for MS/MS set to 1000, 2 MS/MS microscans summed. Data were searched against TAIR10 using MASCOT v2.4.0, semi-ArgC enzyme search specificity, 4 ppm and 0.8 Da MS and MS/MS mass tolerance respectively. Fixed modifications: dimethyl Lys, carboxamidomethyl Cys. Variable mods: dimethyl N-termini, acetyl N-termini, pyroGlu – Gln, oxidized Met.</p> | leaf (A. thaliana) | stroma | wild-type and icp55c-3 |
| 2035 | <p>TAILS experiment of chloroplast stroma to preform relative quantification (precursor-ion based) of protein N-termini between Col-0 control and icp55c-3 mutant, replicate 2A. WT - dimethyl +28, MU - heavy dimethyl +32, Light database search only. 100 micrograms protein of each genotype mixed after dimethyl labeling, proteins digested with trypsin and internal peptides crosslinked to HPG polymer then removed by ultrafiltration (30 kDa cutoff). LTQ Orbitrap, 140 minutes gradient, 5 to 40% D solvent over 96 min, FTMS scans in Profile mode, normalized CE set to 35 (up from 25), min counts for MS/MS set to 1000, 2 MS/MS microscans summed. Data were searched against TAIR10 using MASCOT v2.4.0, semi-ArgC enzyme search specificity, 4 ppm and 0.8 Da MS and MS/MS mass tolerance respectively. Fixed modifications: dimethyl Lys, carboxamidomethyl Cys. Variable mods: dimethyl N-termini, acetyl N-termini, pyroGlu – Gln, oxidized Met.</p>                                                                                                                                                                                                                                                                                                                                                                                                                                                                                                                                                                                                                                                                                               | leaf (A. thaliana) | stroma | wild-type and icp55c-3 |
| 2037 | <p>TAILS experiment of chloroplast stroma to preform relative quantification (precursor-ion based) of protein N-termini between Col-0 control and icp55c-3 mutant, replicate 2B. MU - dimethyl +28, WT - heavy dimethyl +32, Light database search only. 100 micrograms protein of each genotype mixed after dimethyl labeling, proteins digested with trypsin and internal peptides crosslinked to HPG polymer then removed by ultrafiltration (30 kDa cutoff). LTQ Orbitrap, 140 minutes gradient, 5 to 40% D solvent over 96 min, FTMS scans in Profile mode, normalized CE set to 35 (up from 25), min counts for MS/MS set to 1000, 2 MS/MS microscans summed. Data were searched against TAIR10 using MASCOT v2.4.0, semi-ArgC enzyme search specificity, 4 ppm and 0.8 Da MS and MS/MS mass tolerance respectively. Fixed modifications:</p>                                                                                                                                                                                                                                                                                                                                                                                                                                                                                                                                                                                                                                                                                                                                                                                                                      | leaf (A. thaliana) | stroma | wild-type and icp55c-3 |



|      |                                                                                                                                                                                                                                                                                                                                                                                                                                                                                                                                                                                                                                                                                                                                                                                                                                                                                                                                                                                                                                                                                                          |                    |               |                                   |
|------|----------------------------------------------------------------------------------------------------------------------------------------------------------------------------------------------------------------------------------------------------------------------------------------------------------------------------------------------------------------------------------------------------------------------------------------------------------------------------------------------------------------------------------------------------------------------------------------------------------------------------------------------------------------------------------------------------------------------------------------------------------------------------------------------------------------------------------------------------------------------------------------------------------------------------------------------------------------------------------------------------------------------------------------------------------------------------------------------------------|--------------------|---------------|-----------------------------------|
| 2038 | <p>dimethyl Lys, carboxamidomethyl Cys. Variable mods: dimethyl N-termini, acetyl N-termini, pyroGlu – Gln, oxidized Met.</p> <p>TAILS experiment of chloroplast stroma to preform relative quantification (precursor-ion based) of protein N-termini between Col-0 control and icp55c-3 mutant, replicate 2B. MU - dimethyl +28, WT - heavy dimethyl +32, Heavy database search only. 100 micrograms protein of each genotype mixed after dimethyl labeling, proteins digested with trypsin and internal peptides crosslinked to HPG polymer then removed by ultrafiltration (30 kDa cutoff). LTQ Orbitrap, 140 minutes gradient, 5 to 40% D solvent over 96 min, FTMS scans in Profile mode, normalized CE set to 35 (up from 25), min counts for MS/MS set to 1000, 2 MS/MS microscans summed. Data were searched against TAIR10 using MASCOT v2.4.0, semi-ArgC enzyme search specificity, 4 ppm and 0.8 Da MS and MS/MS mass tolerance respectively. Fixed modifications: dimethyl Lys, carboxamidomethyl Cys. Variable mods: dimethyl N-termini, acetyl N-termini, pyroGlu – Gln, oxidized Met.</p> | leaf (A. thaliana) | stroma        | wild-type and icp55c-3            |
| 2042 | <p>TAILS experiment of chloroplast stroma to preform relative quantification (precursor-ion based) of protein N-termini between Col-0 control and icp55c-3 mutant, replicate 3B. MU - dimethyl +28, WT - heavy dimethyl +32, Heavy database search only. 100 micrograms protein of each genotype mixed after dimethyl labeling, proteins digested with trypsin and internal peptides crosslinked to HPG polymer then removed by ultrafiltration (30 kDa cutoff). LTQ Orbitrap, 140 minutes gradient, 5 to 40% D solvent over 96 min, FTMS scans in Profile mode, normalized CE set to 35 (up from 25), min counts for MS/MS set to 1000, 2 MS/MS microscans summed. Data were searched against TAIR10 using MASCOT v2.4.0, semi-ArgC enzyme search specificity, 4 ppm and 0.8 Da MS and MS/MS mass tolerance respectively. Fixed modifications: dimethyl Lys, carboxamidomethyl Cys. Variable mods: dimethyl N-termini, acetyl N-termini, pyroGlu – Gln, oxidized Met.</p>                                                                                                                               | leaf (A. thaliana) | stroma        | wild-type and icp55c-3            |
| 2049 | <p>TAILS experiment of total soluble leaf protein to preform relative quantification (precursor-ion based) of protein N-termini between Col-0 control and prep1xprep2xoop (aabbcc) mutant, replicate 2B. MU - dimethyl +28, WT - heavy dimethyl +32, Light database search only. 100 micrograms protein of each genotype mixed after dimethyl labeling, proteins digested with trypsin and internal peptides crosslinked to HPG polymer then removed by ultrafiltration (30 kDa cutoff). LTQ Orbitrap, 140 minutes gradient, 5 to 40% D solvent over 96 min, FTMS scans in Profile mode, normalized CE set to 35 (up from 25), min counts for MS/MS set to 1000, 2 MS/MS microscans summed. Data were searched against TAIR10 using MASCOT v2.4.0, semi-ArgC enzyme search specificity, 4 ppm and 0.8 Da MS and MS/MS mass tolerance respectively. Fixed modifications: dimethyl Lys, carboxamidomethyl Cys. Variable mods: dimethyl N-termini, acetyl N-termini, pyroGlu – Gln, oxidized Met.</p>                                                                                                       | leaf (A. thaliana) | total soluble | wild-type and prep1-1xprep2-1xoop |
| 2054 | <p>TAILS experiment of total soluble leaf protein to preform relative quantification (precursor-ion based) of protein N-termini between Col-0 control and prep1xprep2xoop (aabbcc) mutant, replicate 3B. MU - dimethyl +28, WT - heavy dimethyl +32, Heavy database search only. 100 micrograms protein of each genotype mixed after dimethyl labeling, proteins digested with trypsin and internal peptides crosslinked to HPG</p>                                                                                                                                                                                                                                                                                                                                                                                                                                                                                                                                                                                                                                                                      | leaf (A. thaliana) | total soluble | wild-type and prep1-1xprep2-1xoop |

|      |                                                                                                                                                                                                                                                                                                                                                                                                                                                                                                                                                                                                                                                                                                                                                                                                                                                                                                                                                                               |                    |               |                           |
|------|-------------------------------------------------------------------------------------------------------------------------------------------------------------------------------------------------------------------------------------------------------------------------------------------------------------------------------------------------------------------------------------------------------------------------------------------------------------------------------------------------------------------------------------------------------------------------------------------------------------------------------------------------------------------------------------------------------------------------------------------------------------------------------------------------------------------------------------------------------------------------------------------------------------------------------------------------------------------------------|--------------------|---------------|---------------------------|
|      | <p>polymer then removed by ultrafiltration (30 kDa cutoff). LTQ Orbitrap, 140 minutes gradient, 5 to 40% D solvent over 96 min, FTMS scans in Profile mode, normalized CE set to 35 (up from 25), min counts for MS/MS set to 1000, 2 MS/MS microscans summed. Data were searched against TAIR10 using MASCOT v2.4.0, semi-ArgC enzyme search specificity, 4 ppm and 0.8 Da MS and MS/MS mass tolerance respectively. Fixed modifications: dimethyl Lys, carboxamidomethyl Cys. Variable mods: dimethyl N-termini, acetyl N-termini, pyroGlu – Gln, oxidized Met.</p>                                                                                                                                                                                                                                                                                                                                                                                                         |                    |               |                           |
| 2055 | <p>TAILS experiment of chloroplast stroma to preform relative quantification (precursor-ion based) of protein N-termini between Col-0 control and cgep mutant, replicate 1A. WT - dimethyl +28, MU - heavy dimethyl +32, Light database search only. 100 micrograms protein of each genotype mixed after dimethyl labeling, proteins digested with trypsin and internal peptides crosslinked to HPG polymer then removed by ultrafiltration (30 kDa cutoff). LTQ Orbitrap, 140 minutes gradient, 5 to 40% D solvent over 96 min, FTMS scans in Profile mode, normalized CE set to 35 (up from 25), min counts for MS/MS set to 1000, 2 MS/MS microscans summed. Data were searched against TAIR10 using MASCOT v2.4.0, semi-ArgC enzyme search specificity, 4 ppm and 0.8 Da MS and MS/MS mass tolerance respectively. Fixed modifications: dimethyl Lys, carboxamidomethyl Cys. Variable mods: dimethyl N-termini, acetyl N-termini, pyroGlu – Gln, oxidized Met.</p>        | leaf (A. thaliana) | stroma        | wild-type and cgep        |
| 2084 | <p>TAILS experiment of chloroplast stroma to preform relative quantification (precursor-ion based) of protein N-termini between Col-0 control and clpt1xclpt2 mutant, replicate 3A. WT - dimethyl +28, MU - heavy dimethyl +32, Heavy database search only. 100 micrograms protein of each genotype mixed after dimethyl labeling, proteins digested with trypsin and internal peptides crosslinked to HPG polymer then removed by ultrafiltration (30 kDa cutoff). LTQ Orbitrap, 140 minutes gradient, 5 to 40% D solvent over 96 min, FTMS scans in Profile mode, normalized CE set to 30 (up from 25), min counts for MS/MS set to 1000, 2 MS/MS microscans summed. Data were searched against TAIR10 using MASCOT v2.4.0, semi-ArgC enzyme search specificity, 4 ppm and 0.8 Da MS and MS/MS mass tolerance respectively. Fixed modifications: dimethyl Lys, carboxamidomethyl Cys. Variable mods: dimethyl N-termini, acetyl N-termini, pyroGlu – Gln, oxidized Met.</p> | leaf (A. thaliana) | total soluble | wild-type and clpt1xclpt2 |
| 2085 | <p>TAILS experiment of chloroplast stroma to preform relative quantification (precursor-ion based) of protein N-termini between Col-0 control and clpt1xclpt2 mutant, replicate 3B. MU - dimethyl +28, WT - heavy dimethyl +32, Light database search only. 100 micrograms protein of each genotype mixed after dimethyl labeling, proteins digested with trypsin and internal peptides crosslinked to HPG polymer then removed by ultrafiltration (30 kDa cutoff). LTQ Orbitrap, 140 minutes gradient, 5 to 40% D solvent over 96 min, FTMS scans in Profile mode, normalized CE set to 30 (up from 25), min counts for MS/MS set to 1000, 2 MS/MS microscans summed. Data were searched against TAIR10 using MASCOT v2.4.0, semi-ArgC enzyme search specificity, 4 ppm and 0.8 Da MS and MS/MS mass tolerance respectively. Fixed modifications: dimethyl Lys, carboxamidomethyl Cys. Variable mods: dimethyl N-termini, acetyl N-termini, pyroGlu – Gln, oxidized Met.</p> | leaf (A. thaliana) | total soluble | wild-type and clpt1xclpt2 |

|      |                                                                                                                                                                                                                                                                                                                                                                          |                    |                                     |           |
|------|--------------------------------------------------------------------------------------------------------------------------------------------------------------------------------------------------------------------------------------------------------------------------------------------------------------------------------------------------------------------------|--------------------|-------------------------------------|-----------|
| 2312 | Isolated thylakoids were run out on SDS-PAGE, cut in 7 consecutive slices/lanes, tryptic in-gel digestion, extraction of peptides, following by nanoLC-MSMS on a QExactive MS instrument. Genotype is wild-type. biological replicate 1                                                                                                                                  | leaf (A. thaliana) | thylakoids<br>thylakoid<br>membrane | wild-type |
| 2313 | Isolated thylakoids were run out on SDS-PAGE, cut in 7 consecutive slices/lanes, tryptic in-gel digestion, extraction of peptides, following by nanoLC-MSMS on a QExactive MS instrument. Genotype is abc1k1. biological replicate 1                                                                                                                                     | leaf (A. thaliana) | thylakoids<br>thylakoid<br>membrane | abc1k1    |
| 2315 | Isolated thylakoids were run out on SDS-PAGE, cut in 7 consecutive slices/lanes, tryptic in-gel digestion, extraction of peptides, following by nanoLC-MSMS on a QExactive MS instrument. Genotype is ab1ck6. biological replicate 1                                                                                                                                     | leaf (A. thaliana) | thylakoids<br>thylakoid<br>membrane | ab1ck6    |
| 2316 | PG were extracted by sonication from isolated thylakoids, followed by density flotation centrifugation, collection and concentrations. Isolated PGs were run out on SDS-PAGE, cut in 7 consecutive slices/lanes, tryptic in-gel digestion, extraction of peptides, following by nanoLC-MSMS on a QExactive MS instrument. Genotype is wild-type. biological replicate 2. | leaf (A. thaliana) | plastoglobuli                       | wild-type |
| 2318 | PG were extracted by sonication from isolated thylakoids, followed by density flotation centrifugation, collection and concentrations. Isolated PGs were run out on SDS-PAGE, cut in 7 consecutive slices/lanes, tryptic in-gel digestion, extraction of peptides, following by nanoLC-MSMS on a QExactive MS instrument. Genotype is abc1k3. biological replicate 2.    | leaf (A. thaliana) | plastoglobuli                       | abc1k3    |
| 2319 | PG were extracted by sonication from isolated thylakoids, followed by density flotation centrifugation, collection and concentrations. Isolated PGs were run out on SDS-PAGE, cut in 7 consecutive slices/lanes, tryptic in-gel digestion, extraction of peptides, following by nanoLC-MSMS on a QExactive MS instrument. Genotype is abc1k6. biological replicate 2.    | leaf (A. thaliana) | plastoglobuli                       | ab1ck6    |
| 2320 | Isolated thylakoids were run out on SDS-PAGE, cut in 9 consecutive slices/lanes, tryptic in-gel digestion, extraction of peptides, following by nanoLC-MSMS on a QExactive MS instrument. Genotype = wild-type. biological replicate 2.                                                                                                                                  | leaf (A. thaliana) | thylakoids<br>thylakoid<br>membrane | wild-type |
| 2321 | Isolated thylakoids were run out on SDS-PAGE, cut in 9 consecutive slices/lanes, tryptic in-gel digestion, extraction of peptides, following by nanoLC-MSMS on a QExactive MS instrument. Genotype is abc1k1. biological replicate 2.                                                                                                                                    | leaf (A. thaliana) | thylakoids<br>thylakoid<br>membrane | ab1ck1    |
| 2324 | Isolated thylakoids were run out on SDS-PAGE, cut in 9 consecutive slices/lanes, tryptic in-gel digestion, extraction of peptides, following by nanoLC-MSMS on a QExactive MS instrument. Genotype is ab1ck3. biological replicate 2.                                                                                                                                    | leaf (A. thaliana) | thylakoids<br>thylakoid<br>membrane | abc1k3    |
| 2325 | Isolated thylakoids were run out on SDS-PAGE, cut in 9 consecutive slices/lanes, tryptic in-gel digestion, extraction of peptides, following by nanoLC-MSMS on a QExactive MS instrument. Genotype is ab1ck6. biological replicate 2.                                                                                                                                    | leaf (A. thaliana) | thylakoids<br>thylakoid<br>membrane | abc1k6    |

---
